# Supplementary material for: Prevalence of common disease-associated variants in Asian Indians
Source: PubMed Central journal article supplement (PMC2267478; doi:10.1186/1471-2156-9-13), 2008-02-04
Supplement: 1471-2156-9-13-S1.pdf [file 1471-2156-9-13-S1.pdf]

**Supplementary Table 4.** Frequencies of the *Cyp3A5* g.6980G>A minor allele in other worldwide populations.

| Population                                      | Region             | Latitude | N  | MAF (A) | Reference |
|-------------------------------------------------|--------------------|----------|----|---------|-----------|
| YRI (Ibadan, Nigeria)                           | Africa             | 7.38     | 60 | 0.850   | [1]       |
| CEPH - Nigeria (Yoruba)                         | Africa             | 8.00     | 25 | 0.060   | [2]       |
| CEPH - Congo (Mbuti Pygmies)                    | Africa             | 1.00     | 15 | 0.070   | [2]       |
| CEPH - Namibia (San)                            | Africa             | -21.00   | 7  | 0.070   | [2]       |
| CEPH - Central African Republic (Biaka Pygmies) | Africa             | 4.00     | 33 | 0.110   | [2]       |
| CEPH - Kenya (Bantu N.E.)                       | Africa             | -3.00    | 12 | 0.170   | [2]       |
| CEPH - S. Africa (Bantu S.E./S.W.)              | Africa             | -25.57   | 8  | 0.190   | [2]       |
| CEPH - Senegal (Mandenka)                       | Africa             | 12.00    | 24 | 0.310   | [2]       |
| CEPH - Mexico (Maya)                            | Americas           | 19.00    | 24 | 0.710   | [2]       |
| CEPH - Mexico (Pima)                            | Americas           | 29.00    | 25 | 0.460   | [2]       |
| CEPH - Brazil (Karitiana)                       | Americas           | -10.00   | 24 | 0.770   | [2]       |
| CEPH - Brazil (Surui)                           | Americas           | -11.00   | 21 | 0.830   | [2]       |
| CEPH - Colombia                                 | Americas           | 3.00     | 13 | 0.850   | [2]       |
| CEPH - China (Uyur)                             | Central/South Asia | 44.00    | 10 | 0.950   | [2]       |
| CEPH - Pakistan (Hazara)                        | Central/South Asia | 33.50    | 25 | 0.750   | [2]       |
| CEPH - Pakistan (Kalash)                        | Central/South Asia | 35.99    | 25 | 0.760   | [2]       |
| CEPH - Pakistan (Makrani)                       | Central/South Asia | 26.00    | 25 | 0.860   | [2]       |
| CEPH - Pakistan (Brahui)                        | Central/South Asia | 30.50    | 25 | 0.880   | [2]       |
| CEPH - Pakistan (Pathan)                        | Central/South Asia | 33.49    | 25 | 0.880   | [2]       |
| CEPH - Pakistan (Burusho)                       | Central/South Asia | 36.50    | 25 | 0.780   | [2]       |
| CEPH - Pakistan (Balochi)                       | Central/South Asia | 30.50    | 25 | 0.800   | [2]       |
| CEPH - Pakistan (Sindhi)                        | Central/South Asia | 25.49    | 25 | 0.820   | [2]       |
| CHB (Beijing, China)                            | East Asia          | 35.21    | 45 | 0.333   | [1]       |
| JPT (Tokyo, Japan)                              | East Asia          | 35.68    | 44 | 0.250   | [1]       |
| CEPH - China (Dai)                              | East Asia          | 21.00    | 10 | 0.550   | [2]       |
| CEPH - China (She)                              | East Asia          | 27.00    | 10 | 0.550   | [2]       |
| CEPH - China (Miao)                             | East Asia          | 28.00    | 10 | 0.650   | [2]       |
| CEPH - China (Tujia)                            | East Asia          | 29.00    | 10 | 0.650   | [2]       |
| CEPH - China (Mongolia)                         | East Asia          | 45.00    | 10 | 0.650   | [2]       |
| CEPH - China (Lahu)                             | East Asia          | 22.00    | 10 | 0.750   | [2]       |
| CEPH - China (Han)                              | East Asia          | 32.27    | 44 | 0.750   | [2]       |
| CEPH - China (Naxi)                             | East Asia          | 26.00    | 9  | 0.720   | [2]       |
| CEPH - China (Xibo)                             | East Asia          | 43.50    | 9  | 0.780   | [2]       |
| CEPH - China (Yizu)                             | East Asia          | 28.00    | 10 | 0.800   | [2]       |
| CEPH - China (Hezhen)                           | East Asia          | 47.50    | 10 | 0.850   | [2]       |
| CEPH - China (Daur)                             | East Asia          | 48.50    | 10 | 0.850   | [2]       |
| CEPH - China (Tu)                               | East Asia          | 36.00    | 10 | 0.900   | [2]       |
| CEPH - China (Orogen)                           | East Asia          | 50.43    | 10 | 0.900   | [2]       |
| CEPH - Cambodia                                 | East Asia          | 12.00    | 11 | 0.730   | [2]       |
| CEPH - Japan                                    | East Asia          | 38.00    | 31 | 0.770   | [2]       |
| CEPH - Siberia (Yakut)                          | East Asia          | 62.98    | 25 | 0.900   | [2]       |
| CEU (Utah, USA)                                 | Europe             | 40.76    | 60 | 0.058   | [1]       |
| CEPH - Orkney Islands (Orkadian)                | Europe             | 59.00    | 16 | 0.840   | [2]       |
| CEPH - Russia Caucasus (Adygei)                 | Europe             | 44.00    | 17 | 0.880   | [2]       |
| CEPH - France                                   | Europe             | 46.00    | 29 | 0.910   | [2]       |

|                                  |             |       |    |       |     |
|----------------------------------|-------------|-------|----|-------|-----|
| CEPH - Russian                   | Europe      | 61.00 | 25 | 0.920 | [2] |
| CEPH - Italy (Bergamo)           | Europe      | 46.00 | 14 | 0.820 | [2] |
| CEPH - Italy (Tuscan)            | Europe      | 43.00 | 8  | 0.940 | [2] |
| CEPH - Italy (Sardinian)         | Europe      | 40.00 | 28 | 0.950 | [2] |
| CEPH - France (Basque)           | Europe      | 43.00 | 24 | 0.960 | [2] |
| CEPH - Israel (Palestinian)      | Middle East | 32.00 | 51 | 0.820 | [2] |
| CEPH - Israel (Bedouin)          | Middle East | 31.00 | 48 | 0.830 | [2] |
| CEPH - Algeria (Mozabite)        | Middle East | 32.00 | 29 | 0.840 | [2] |
| CEPH - Israel (Druze)            | Middle East | 32.00 | 48 | 0.920 | [2] |
| CEPH - Melanesian (Bougainville) | Oceania     | -6.00 | 22 | 0.820 | [2] |
| CEPH - New Guinea (Papuan)       | Oceania     | -4.00 | 17 | 0.790 | [2] |

**Supplementary Table 5.** Frequencies of the *AGT* g.802C>T minor allele in other worldwide populations.

| Population                                      | Region             | Latitude | N   | MAF (T) | Reference |
|-------------------------------------------------|--------------------|----------|-----|---------|-----------|
| Zimbabwe (Harare)                               | Africa             | -17.82   | 40  | 0.100   | [3]       |
| CEPH - Nigeria (Yoruba)                         | Africa             | 8.00     | 20  | 0.120   | [2]       |
| CEPH - Congo (Mbuti Pygmies)                    | Africa             | 1.00     | 13  | 0.040   | [2]       |
| CEPH - Namibia (San)                            | Africa             | -21.00   | 7   | 0.000   | [2]       |
| CEPH - Central African Republic (Biaka Pygmies) | Africa             | 4.00     | 31  | 0.030   | [2]       |
| CEPH - Kenya (Bantu N.E.)                       | Africa             | -3.00    | 10  | 0.150   | [2]       |
| CEPH - S. Africa (Bantu S.E./S.W.)              | Africa             | -25.57   | 7   | 0.070   | [2]       |
| CEPH - Senegal (Mandenka)                       | Africa             | 12.00    | 23  | 0.040   | [2]       |
| North American Inuit                            | Americas           | 65.00    | 350 | 0.180   | [4]       |
| Mexican - Maya                                  | Americas           | 19.00    | 102 | 0.180   | [4]       |
| Peru - Quechua                                  | Americas           | -16.56   | 208 | 0.240   | [4]       |
| CEPH - Brazil (Surui)                           | Americas           | -11.00   | 21  | 0.000   | [2]       |
| CEPH - Brazil (Karitiana)                       | Americas           | -10.00   | 24  | 0.000   | [2]       |
| CEPH - Colombia                                 | Americas           | 3.00     | 13  | 0.150   | [2]       |
| CEPH - Mexico (Pima)                            | Americas           | 29.00    | 25  | 0.100   | [2]       |
| CEPH - Mexico (Maya)                            | Americas           | 19.00    | 25  | 0.080   | [2]       |
| CEPH - China (Uyгур)                            | Central/South Asia | 44.00    | 10  | 0.600   | [2]       |
| CEPH - Pakistan (Hazara)                        | Central/South Asia | 33.50    | 24  | 0.270   | [2]       |
| CEPH - Pakistan (Kalash)                        | Central/South Asia | 35.99    | 25  | 0.300   | [2]       |
| CEPH - Pakistan (Burusho)                       | Central/South Asia | 36.50    | 24  | 0.230   | [2]       |
| CEPH - Pakistan (Balochi)                       | Central/South Asia | 30.50    | 21  | 0.430   | [2]       |
| CEPH - Pakistan (Sindhi)                        | Central/South Asia | 25.49    | 25  | 0.160   | [2]       |
| CEPH - Pakistan (Makrani)                       | Central/South Asia | 26.00    | 25  | 0.260   | [2]       |
| CEPH - Pakistan (Brahui)                        | Central/South Asia | 30.50    | 25  | 0.460   | [2]       |
| CEPH - Pakistan (Pathan)                        | Central/South Asia | 33.49    | 24  | 0.250   | [2]       |
| Chinese - Han                                   | East Asia          | 32.27    | 414 | 0.130   | [4]       |
| Japanese (JBIC-allele)                          | East Asia          | 38.00    | 552 | 0.188   | [3]       |
| IMCJ-JP1- EAST ASIA (Japanese)                  | East Asia          | 38.00    | 130 | 0.200   | [3]       |
| IMCJ-JP2- EAST ASIA (Japanese)                  | East Asia          | 38.00    | 88  | 0.159   | [3]       |
| CEPH - China (Dai)                              | East Asia          | 21.00    | 10  | 0.100   | [2]       |
| CEPH - China (She)                              | East Asia          | 27.00    | 10  | 0.200   | [2]       |
| CEPH - China (Miaozu)                           | East Asia          | 28.00    | 10  | 0.150   | [2]       |
| CEPH - China (Tujia)                            | East Asia          | 29.00    | 10  | 0.150   | [2]       |
| CEPH - China (Mongolia)                         | East Asia          | 45.00    | 10  | 0.200   | [2]       |
| CEPH - China (Naxi)                             | East Asia          | 26.00    | 10  | 0.150   | [2]       |
| CEPH - China (Lahu)                             | East Asia          | 22.00    | 10  | 0.050   | [2]       |
| CEPH - China (Han)                              | East Asia          | 32.27    | 44  | 0.160   | [2]       |
| CEPH - China (Xibo)                             | East Asia          | 43.50    | 9   | 0.330   | [2]       |
| CEPH - China (Yizu)                             | East Asia          | 28.00    | 10  | 0.250   | [2]       |
| CEPH - China (Hezhen)                           | East Asia          | 47.50    | 10  | 0.150   | [2]       |
| CEPH - China (Daur)                             | East Asia          | 48.50    | 10  | 0.300   | [2]       |
| CEPH - China (Tu)                               | East Asia          | 36.00    | 10  | 0.200   | [2]       |
| CEPH - China (Orogen)                           | East Asia          | 50.43    | 10  | 0.100   | [2]       |
| CEPH - Japan                                    | East Asia          | 38.00    | 30  | 0.270   | [2]       |

|                                     |             |       |      |       |     |
|-------------------------------------|-------------|-------|------|-------|-----|
| CEPH - Cambodia                     | East Asia   | 12.00 | 11   | 0.140 | [2] |
| CEPH - Siberia (Yakut)              | East Asia   | 62.98 | 25   | 0.260 | [2] |
| Czech (Prague)                      | Europe      | 50.08 | 250  | 0.560 | [4] |
| French                              | Europe      | 46.00 | 1716 | 0.584 | [4] |
| Spaniards (Madrid)                  | Europe      | 40.42 | 790  | 0.570 | [4] |
| IMCJ-CA1- NORTH AMERICA (Caucasian) | Europe      | ~     | 198  | 0.611 | [3] |
| CEPH - Italy (Bergamo)              | Europe      | 46.00 | 14   | 0.360 | [2] |
| CEPH - Orkney Islands (Orcadian)    | Europe      | 59.00 | 16   | 0.560 | [2] |
| CEPH - Russia Caucasus (Adygei)     | Europe      | 44.00 | 17   | 0.590 | [2] |
| CEPH - France                       | Europe      | 46.00 | 28   | 0.660 | [2] |
| CEPH - Russian                      | Europe      | 61.00 | 24   | 0.560 | [2] |
| CEPH - Italy (Tuscan)               | Europe      | 43.00 | 7    | 0.280 | [2] |
| CEPH - Italy (Sardinian)            | Europe      | 40.00 | 28   | 0.630 | [2] |
| CEPH - France (Basque)              | Europe      | 43.00 | 20   | 0.680 | [2] |
| CEPH - Algeria (Mozabite)           | Middle East | 32.00 | 26   | 0.400 | [2] |
| CEPH - Israel (Palestinian)         | Middle East | 32.00 | 50   | 0.460 | [2] |
| CEPH - Israel (Bedouin)             | Middle East | 31.00 | 48   | 0.440 | [2] |
| CEPH - Israel (Druze)               | Middle East | 32.00 | 48   | 0.440 | [2] |
| CEPH - New Guinea (Papuan)          | Oceania     | -4.00 | 17   | 0.090 | [2] |
| CEPH - Melanesian (Bougainville)    | Oceania     | -6.00 | 22   | 0.050 | [2] |

**Supplementary Table 6.** Frequencies of the *GNB3* g.4423C>T minor allele in other worldwide populations.

| Population                                | Region             | Latitude | N    | MAF (T) | Reference |
|-------------------------------------------|--------------------|----------|------|---------|-----------|
| Zimbabwe (Harare)                         | Africa             | -17.86   | 299  | 0.810   | [5]       |
| Brazil (Xingu)                            | Americas           | -7.73    | 25   | 0.260   | [5]       |
| Brazil (Yanomami)                         | Americas           | 3.13     | 25   | 0.320   | [5]       |
| Brazil (Vitoria)                          | Americas           | -20.29   | 1568 | 0.450   | [6]       |
| Brazil (Caucasian)                        | Americas           | -20.29   | 548  | 0.362   | [6]       |
| Brazil (Mulatto)                          | Americas           | -20.29   | 795  | 0.487   | [6]       |
| Brazil (African origin)                   | Americas           | -20.29   | 122  | 0.627   | [6]       |
| Brazil (Other)                            | Americas           | -20.29   | 87   | 0.391   | [6]       |
| Pakistan (Islamabad)                      | Central/South Asia | 33.71    | 211  | 0.517   | [7]       |
| Japan (Osaka)                             | East Asia          | 35.95    | 1640 | 0.524   | [5]       |
| Japan (Tochigi Prefecture)                | East Asia          | 36.38    | 1640 | 0.524   | [5]       |
| Japan (Toyama)                            | East Asia          | 36.68    | 1640 | 0.524   | [5]       |
| China (Han)                               | East Asia          | 32.27    | 503  | 0.470   | [8]       |
| China (Beijing)                           | East Asia          | 39.87    | 625  | 0.513   | [5]       |
| China (Tianjin)                           | East Asia          | 39.13    | 625  | 0.513   | [5]       |
| China (Nanning)                           | East Asia          | 22.82    | 244  | 0.430   | [5]       |
| South Korea (Pusan)                       | East Asia          | 35.70    | 31   | 0.440   | [5]       |
| Taiwan (San Chilo village)                | East Asia          | 23.35    | 199  | 0.543   | [5]       |
| US (White, Goodman)                       | Europe             | 32.58    | 1302 | 0.291   | [5]       |
| US (White, Jackson)                       | Europe             | 32.32    | 1302 | 0.291   | [5]       |
| Belgium (Charleroi)                       | Europe             | 50.42    | 1512 | 0.308   | [5]       |
| Belgium (Ghent)                           | Europe             | 51.05    | 1512 | 0.308   | [5]       |
| Finland (Joensuu)                         | Europe             | 61.57    | 100  | 0.240   | [5]       |
| Finland (Turku)                           | Europe             | 60.45    | 100  | 0.240   | [5]       |
| Hungary (Porcsalma Village)               | Europe             | 47.88    | 27   | 0.320   | [5]       |
| Italy (Bassiano)                          | Europe             | 41.55    | 39   | 0.300   | [5]       |
| Italy (Gubbio)                            | Europe             | 43.35    | 29   | 0.300   | [5]       |
| Italy (Mirano)                            | Europe             | 45.49    | 45   | 0.320   | [5]       |
| Poland (Krakow)                           | Europe             | 50.08    | 60   | 0.220   | [5]       |
| Poland (Warsaw)                           | Europe             | 52.25    | 60   | 0.220   | [5]       |
| Soviet Union (Moscow)                     | Europe             | 55.75    | 53   | 0.220   | [5]       |
| East Germany (Cottbus)                    | Europe             | 51.67    | 1855 | 0.300   | [5]       |
| West Germany (Bernried)                   | Europe             | 49.32    | 1855 | 0.300   | [5]       |
| West Germany (Heidelberg)                 | Europe             | 49.42    | 1855 | 0.300   | [5]       |
| United Kingdom (Belfast)                  | Europe             | 54.58    | 163  | 0.300   | [5]       |
| Spain (Sevilla)                           | Europe             | 37.39    | 78   | 0.397   | [9]       |
| Spain (Manresa)                           | Europe             | 41.73    | 30   | 0.300   | [5]       |
| Spain (Torrejon)                          | Europe             | 40.65    | 30   | 0.300   | [5]       |
| Danish (Copenhagen)                       | Europe             | 55.68    | 4193 | 0.310   | [10]      |
| Papua New Guinea (Asaro Valley)           | Oceania            | -6.58    | 47   | 0.564   | [5]       |
| US (African-American, Goodman)            |                    | 32.58    | 821  | 0.260   | [5]       |
| US (African American, Jackson)            |                    | 32.32    | 821  | 0.260   | [5]       |
| Trinidad and Tobago (Plymouth, Bethesada) |                    | 11.22    | 10   | 0.850   | [5]       |

**Supplementary Table 7.** Frequencies of the *CAPN10* g.4834T>C minor allele in other worldwide populations.

| Population     | Region    | N  | MAF (C) | Reference |
|----------------|-----------|----|---------|-----------|
| YRI            | Africa    | 60 | 0.017   | [1]       |
| Biaka          | Africa    | ~  | 0.020   | [4]       |
| Mbuti          | Africa    | ~  | 0.020   | [4]       |
| AFD_AFR_PANEL  | Africa    | 23 | 0.022   | [11]      |
| Maya           | Americas  | ~  | 0.060   | [4]       |
| Surui          | Americas  | ~  | 0.010   | [4]       |
| CHB            | East Asia | 45 | 0.111   | [1]       |
| JPT            | East Asia | 45 | 0.089   | [1]       |
| Han            | East Asia | ~  | 0.100   | [4]       |
| Japanese       | East Asia | ~  | 0.010   | [4]       |
| AFD_CHN_PANEL  | East Asia | 24 | 0.063   | [11]      |
| Yakut          | East Asia | ~  | 0.120   | [4]       |
| CEU            | Europe    | 60 | 0.167   | [1]       |
| Druze          | Europe    | ~  | 0.140   | [4]       |
| Danes          | Europe    | ~  | 0.180   | [4]       |
| Europe (Mixed) | Europe    | ~  | 0.120   | [4]       |
| AFD_EUR_PANEL  | Europe    | 24 | 0.125   | [11]      |

**Supplementary Table 8.** Frequencies of the *TCF7L2* g.98386G>T minor allele in other worldwide populations.

| Population | Region    | N   | MAF (T) | Reference |
|------------|-----------|-----|---------|-----------|
| Icelandic  | Europe    | 795 | 0.288   | [12]      |
| Danish     | Europe    | 520 | 0.261   | [12]      |
| US         | Europe    | 509 | 0.259   | [12]      |
| CEU        | Europe    | 60  | 0.217   | [1]       |
| CHB        | East Asia | 45  | 0.000   | [1]       |
| JPT        | East Asia | 44  | 0.023   | [1]       |
| YRI        | Africa    | 60  | 0.267   | [1]       |

**Supplementary Table 9.** Frequencies of the *PTPN22* g.36677C>T minor allele in other worldwide populations.

| Population | Region    | N    | MAF (T) | Reference |
|------------|-----------|------|---------|-----------|
| YRI        | Africa    | 60   | 0.000   | [1]       |
| CHB        | East Asia | 45   | 0.000   | [1]       |
| JPT        | East Asia | 44   | 0.000   | [1]       |
| UK         | Europe    | 374  | 0.084   | [13]      |
| Spanish    | Europe    | 812  | 0.062   | [14]      |
| German     | Europe    | 214  | 0.030   | [15]      |
| French     | Europe    | 100  | 0.090   | [16]      |
| French     | Europe    | 296  | 0.074   | [17]      |
| Canadian   | Europe    | 791  | 0.086   | [18]      |
| CEU        | Europe    | 60   | 0.142   | [1]       |
| US         | Europe    | ~    | 0.089   | [19]      |
| US         | Europe    | 1178 | 0.086   | [20]      |
| US         | Europe    | 1961 | 0.086   | [21]      |

**Supplementary Table 10.** Frequencies of the *ALOX5* g.20C>T minor allele in other worldwide populations.

| <b>Population</b> | <b>Region</b> | <b>N</b> | <b>MAF (T)</b> | <b>Reference</b> |
|-------------------|---------------|----------|----------------|------------------|
| Caucasian         | Europe        | 60       | 0.100          | [22]             |
| African           | Africa        | 48       | 0.000          | [22]             |
| Hispanic          | Americas      | 46       | 0.000          | [22]             |
| Pacific           | Oceania       | 46       | 0.000          | [22]             |

**Supplementary Table 11.** Frequencies of the *ALOX5* g.8322G>A minor allele in other worldwide populations.

| Population | Region    | N    | MAF (A) | Reference |
|------------|-----------|------|---------|-----------|
| YRI        | Africa    | 60   | 0.642   | [1]       |
| African    | Africa    | 46   | 0.348   | [23]      |
| African    | Africa    | 60   | 0.109   | [23]      |
| Hispanic   | Americas  | 46   | 0.087   | [23]      |
| CHB        | East Asia | 45   | 0.089   | [1]       |
| JPT        | East Asia | 44   | 0.057   | [1]       |
| Chinese    | East Asia | 48   | 0.042   | [23]      |
| Japanese   | East Asia | 1482 | 0.042   | [23]      |
| Asian      | East Asia | 84   | 0.045   | [23]      |
| CEU        | Europe    | 60   | 0.017   | [1]       |
| European   | Europe    | 48   | 0.021   | [23]      |
| Caucasian  | Europe    | 198  | 0.000   | [23]      |
| Pacific    | Oceania   | 46   | 0.000   | [23]      |

**Supplementary Table 12.** Frequencies of the *ALOX5* g.50778G>A minor allele in other worldwide populations.

| Population | Region    | N    | MAF (A) | Reference |
|------------|-----------|------|---------|-----------|
| AFR1       | Africa    | 48   | 0.083   | [24]      |
| African    | Africa    | 118  | 0.144   | [24]      |
| HISP1      | Americas  | 44   | 0.000   | [24]      |
| Japanese   | East Asia | 1480 | 0.016   | [24]      |
| CAUC1      | Europe    | 62   | 0.000   | [24]      |
| Caucasian  | Europe    | 120  | 0.000   | [24]      |
| PAC1       | Oceania   | 46   | 0.022   | [24]      |

**Supplementary Table 13.** Frequencies of the *rs1447295* minor allele in other worldwide populations.

| Population     | Region    | N   | MAF (A) | Reference |
|----------------|-----------|-----|---------|-----------|
| YRI            | Africa    | 60  | 0.342   | [1]       |
| Asian          | East Asia | 42  | 0.150   | [25]      |
| CHB            | East Asia | 45  | 0.111   | [1]       |
| JPT            | East Asia | 44  | 0.205   | [1]       |
| Japan          | East Asia | 37  | 0.149   | [25]      |
| Asian          | East Asia | 24  | 0.104   | [25]      |
| Sweden         | Europe    | 779 | 0.133   | [26]      |
| Iceland        | Europe    | 997 | 0.106   | [26]      |
| US (Caucasian) | Europe    | 247 | 0.082   | [26]      |
| European       | Europe    | 24  | 0.083   | [25]      |
| CEU            | Europe    | 60  | 0.067   | [1]       |
| Caucasian      | Europe    | 41  | 0.048   | [25]      |

**Supplementary Table 14.** Frequencies of the *SLC24A5* g.13242G>A minor allele in other worldwide populations.

| Population         | Region    | N   | MAF (G) | Reference |
|--------------------|-----------|-----|---------|-----------|
| YRI                | Africa    | 60  | 0.975   | [1]       |
| Nigeria            | Africa    | 95  | 0.980   | [27]      |
| Puerto Rican       | Americas  | 95  | 0.410   | [27]      |
| Mexican American   | Americas  | 90  | 0.500   | [27]      |
| Mexican            | Americas  | 94  | 0.620   | [27]      |
| Amerindian (Mayan) | Americas  | 72  | 0.950   | [27]      |
| CHB                | East Asia | 45  | 0.989   | [1]       |
| JPT                | East Asia | 44  | 0.989   | [1]       |
| East Asian         | East Asia | 80  | 0.970   | [27]      |
| AoD Chinese        | East Asia | 90  | 0.990   | [27]      |
| CEU                | Europe    | 59  | 0.000   | [1]       |
| AoD Caucasian      | Europe    | 92  | 0.020   | [27]      |
| European American  | Europe    | 114 | 0.000   | [27]      |

**Supplementary Table 15.** Frequencies of the *CFH* g.37989T>C minor allele in other worldwide populations.

| Population | Region    | N   | MAF (C) | Reference |
|------------|-----------|-----|---------|-----------|
| YRI        | Africa    | 60  | 0.307   | [1]       |
| CHB        | East Asia | 45  | 0.068   | [1]       |
| JPT        | East Asia | 44  | 0.081   | [1]       |
| US         | Europe    | 24  | 0.542   | [28]      |
| US         | Europe    | 202 | 0.356   | [29]      |
| German     | Europe    | 275 | 0.338   | [30]      |
| Icelandic  | Europe    | 171 | 0.354   | [31]      |
| Icelandic  | Europe    | 891 | 0.389   | [31]      |
| Utah       | Europe    | 203 | 0.399   | [31]      |
| French     | Europe    | 91  | 0.302   | [32]      |
| UK         | Europe    | 262 | 0.363   | [33]      |
| CEU        | Europe    | 59  | 0.390   | [1]       |

**Supplementary Table 16.** Frequencies of the *LOC381175* g.205G>T minor allele in other worldwide populations.

| Population | Region    | N  | MAF (T) | Reference |
|------------|-----------|----|---------|-----------|
| YRI        | African   | 60 | 0.308   | [1]       |
| CHB        | East Asia | 45 | 0.466   | [1]       |
| JPT        | East Asia | 44 | 0.420   | [1]       |
| Asian      | East Asia | 10 | 0.400   | [34]      |
| CEU        | Europe    | 60 | 0.217   | [1]       |
| Caucasian  | Europe    | 24 | 0.167   | [34]      |
| European   | Europe    | 12 | 0.000   | [34]      |

**Supplementary Table 17.** Frequencies of the *RET* g.9349G>A minor allele in other worldwide populations.

| <b>Population</b> | <b>Region</b> | <b>N</b> | <b>MAF (T)</b> | <b>Reference</b> |
|-------------------|---------------|----------|----------------|------------------|
| CEPH-Africa       | Africa        | ~        | 0.001          | [35]             |
| CEPH-Asia         | East Asia     | ~        | 0.450          | [35]             |
| CEPH-Europe       | Europe        | ~        | 0.250          | [35]             |

**Supplementary Table 18.** Frequencies of the *TAS2R38* g.144G>C minor allele in other worldwide populations.

| Population          | Region             | N   | MAF (C) | Reference |
|---------------------|--------------------|-----|---------|-----------|
| YRI                 | Africa             | 60  | 0.392   | [1]       |
| Biaka               | Africa             | 138 | 0.717   | [4]       |
| Hausa               | Africa             | 78  | 0.436   | [4]       |
| Ibo                 | Africa             | 96  | 0.438   | [4]       |
| Mbuti               | Africa             | 76  | 0.539   | [4]       |
| Yoruba              | Africa             | 156 | 0.474   | [4]       |
| Chagga              | Africa             | 90  | 0.556   | [4]       |
| Ethiopian           | Africa             | 62  | 0.500   | [4]       |
| Masai               | Africa             | 40  | 0.525   | [4]       |
| Cheyenne            | Americas           | 108 | 0.380   | [4]       |
| Pima (Arizona)      | Americas           | 102 | 0.039   | [4]       |
| Pima (Mexico)       | Americas           | 106 | 0.019   | [4]       |
| Maya (Yucatan)      | Americas           | 96  | 0.115   | [4]       |
| Karitiana           | Americas           | 110 | 0.000   | [4]       |
| Surui               | Americas           | 90  | 0.244   | [4]       |
| Ticuna              | Americas           | 130 | 0.100   | [4]       |
| Khanty              | Central/South Asia | 100 | 0.620   | [4]       |
| CHB                 | East Asia          | 45  | 0.678   | [1]       |
| JPT                 | East Asia          | 44  | 0.534   | [1]       |
| Ami                 | East Asia          | 80  | 0.225   | [4]       |
| Atayal              | East Asia          | 80  | 0.450   | [4]       |
| Han                 | East Asia          | 96  | 0.302   | [4]       |
| Han                 | East Asia          | 110 | 0.327   | [4]       |
| Japanese            | East Asia          | 92  | 0.467   | [4]       |
| Korean              | East Asia          | 128 | 0.453   | [4]       |
| Cambodians (Khmer)  | East Asia          | 50  | 0.360   | [4]       |
| Hakka               | East Asia          | 82  | 0.232   | [4]       |
| Yakut               | East Asia          | 102 | 0.549   | [4]       |
| CEU                 | Europe             | 60  | 0.425   | [1]       |
| Druze               | Europe             | 204 | 0.426   | [4]       |
| Jews (Yemenite)     | Europe             | 82  | 0.500   | [4]       |
| Samaritans          | Europe             | 80  | 0.375   | [4]       |
| Adygei              | Europe             | 108 | 0.528   | [4]       |
| Chuvash             | Europe             | 82  | 0.683   | [4]       |
| Danes               | Europe             | 102 | 0.588   | [4]       |
| Europeans (Mixed)   | Europe             | 176 | 0.659   | [4]       |
| Finns               | Europe             | 70  | 0.543   | [4]       |
| Irish               | Europe             | 222 | 0.568   | [4]       |
| Jews (Ashkenazi)    | Europe             | 162 | 0.469   | [4]       |
| Russians            | Europe             | 96  | 0.594   | [4]       |
| Komi-Zyrian         | Europe             | 94  | 0.606   | [4]       |
| Melanesian (Nasioi) | Oceania            | 42  | 0.190   | [4]       |
| Micronesians        | Oceania            | 68  | 0.250   | [4]       |

**Supplementary Table 19.** Frequencies of the *TAS2R38* g.784C>T minor allele in other worldwide populations.

| Population          | Region             | N   | MAF (C) | Reference |
|---------------------|--------------------|-----|---------|-----------|
| YRI                 | Africa             | 60  | 0.667   | [1]       |
| Biaka               | Africa             | 138 | 0.720   | [4]       |
| Hausa               | Africa             | 78  | 0.750   | [4]       |
| Ibo                 | Africa             | 96  | 0.745   | [4]       |
| Mbuti               | Africa             | 76  | 0.878   | [4]       |
| Yoruba              | Africa             | 156 | 0.795   | [4]       |
| Chagga              | Africa             | 90  | 0.756   | [4]       |
| Ethiopian           | Africa             | 62  | 0.554   | [4]       |
| Masai               | Africa             | 40  | 0.750   | [4]       |
| Cheyenne            | Americas           | 108 | 0.627   | [4]       |
| Pima (Arizona)      | Americas           | 102 | 0.959   | [4]       |
| Pima (Mexico)       | Americas           | 106 | 0.981   | [4]       |
| Maya (Yucatan)      | Americas           | 96  | 0.883   | [4]       |
| Karitiana           | Americas           | 110 | 1.000   | [4]       |
| Surui               | Americas           | 90  | 0.756   | [4]       |
| Ticuna              | Americas           | 130 | 0.908   | [4]       |
| Khanty              | Central/South Asia | 100 | 0.380   | [4]       |
| CHB                 | East Asia          | 45  | 0.678   | [1]       |
| JPT                 | East Asia          | 44  | 0.534   | [1]       |
| Ami                 | East Asia          | 80  | 0.775   | [4]       |
| Atayal              | East Asia          | 80  | 0.550   | [4]       |
| Han                 | East Asia          | 96  | 0.689   | [4]       |
| Han                 | East Asia          | 110 | 0.667   | [4]       |
| Japanese            | East Asia          | 92  | 0.522   | [4]       |
| Korean              | East Asia          | 128 | 0.547   | [4]       |
| Cambodians (Khmer)  | East Asia          | 50  | 0.640   | [4]       |
| Hakka               | East Asia          | 82  | 0.768   | [4]       |
| Yakut               | East Asia          | 102 | 0.451   | [4]       |
| CEU                 | Europe             | 60  | 0.500   | [1]       |
| Druze               | Europe             | 204 | 0.594   | [4]       |
| Jews (Yemenite)     | Europe             | 82  | 0.525   | [4]       |
| Samaritans          | Europe             | 80  | 0.613   | [4]       |
| Adygei              | Europe             | 108 | 0.500   | [4]       |
| Chuvash             | Europe             | 82  | 0.342   | [4]       |
| Danes               | Europe             | 102 | 0.451   | [4]       |
| Europeans (Mixed)   | Europe             | 176 | 0.394   | [4]       |
| Finns               | Europe             | 70  | 0.471   | [4]       |
| Irish               | Europe             | 222 | 0.500   | [4]       |
| Jews (Ashkenazi)    | Europe             | 162 | 0.580   | [4]       |
| Russians            | Europe             | 96  | 0.424   | [4]       |
| Komi-Zyrian         | Europe             | 94  | 0.394   | [4]       |
| Melanesian (Nasioi) | Oceania            | 42  | 0.800   | [4]       |
| Micronesians        | Oceania            | 68  | 0.743   | [4]       |

**Supplementary Table 20.** Frequencies of the *TAS2R38* g.885A>G minor allele in other worldwide populations.

| Population          | Region             | N   | Allele (G) | Reference |
|---------------------|--------------------|-----|------------|-----------|
| YRI                 | Africa             | 60  | 0.398      | [1]       |
| Biaka               | Africa             | 138 | 0.277      | [4]       |
| Hausa               | Africa             | 78  | 0.579      | [4]       |
| Ibo                 | Africa             | 96  | 0.552      | [4]       |
| Mbuti               | Africa             | 76  | 0.621      | [4]       |
| Yoruba              | Africa             | 156 | 0.507      | [4]       |
| Chagga              | Africa             | 90  | 0.443      | [4]       |
| Ethiopian           | Africa             | 62  | 0.519      | [4]       |
| Masai               | Africa             | 40  | 0.500      | [4]       |
| Cheyenne            | Americas           | 108 | 0.640      | [4]       |
| Pima (Arizona)      | Americas           | 102 | 0.960      | [4]       |
| Pima (Mexico)       | Americas           | 106 | 0.990      | [4]       |
| Maya (Yucatan)      | Americas           | 96  | 0.883      | [4]       |
| Karitiana           | Americas           | 110 | 1.000      | [4]       |
| Surui               | Americas           | 90  | 0.761      | [4]       |
| Ticuna              | Americas           | 130 | 0.902      | [4]       |
| Khanty              | Central/South Asia | 100 | 0.380      | [4]       |
| CHB                 | East Asia          | 45  | 0.678      | [1]       |
| JPT                 | East Asia          | 44  | 0.537      | [1]       |
| Ami                 | East Asia          | 80  | 0.769      | [4]       |
| Atayal              | East Asia          | 80  | 0.550      | [4]       |
| Han                 | East Asia          | 96  | 0.696      | [4]       |
| Han                 | East Asia          | 110 | 0.667      | [4]       |
| Japanese            | East Asia          | 92  | 0.541      | [4]       |
| Korean              | East Asia          | 128 | 0.546      | [4]       |
| Cambodians (Khmer)  | East Asia          | 50  | 0.667      | [4]       |
| Hakka               | East Asia          | 82  | 0.775      | [4]       |
| Yakut               | East Asia          | 102 | 0.468      | [4]       |
| CEU                 | Europe             | 60  | 0.500      | [1]       |
| Druze               | Europe             | 204 | 0.595      | [4]       |
| Jews (Yemenite)     | Europe             | 82  | 0.513      | [4]       |
| Samaritans          | Europe             | 80  | 0.569      | [4]       |
| Adygei              | Europe             | 108 | 0.491      | [4]       |
| Chuvash             | Europe             | 82  | 0.341      | [4]       |
| Danes               | Europe             | 102 | 0.451      | [4]       |
| Europeans (Mixed)   | Europe             | 176 | 0.401      | [4]       |
| Finns               | Europe             | 70  | 0.457      | [4]       |
| Irish               | Europe             | 222 | 0.505      | [4]       |
| Jews (Ashkenazi)    | Europe             | 162 | 0.580      | [4]       |
| Russians            | Europe             | 96  | 0.417      | [4]       |
| Komi-Zyrian         | Europe             | 94  | 0.391      | [4]       |
| Melanesian (Nasioi) | Oceania            | 42  | 0.806      | [4]       |
| Micronesians        | Oceania            | 68  | 0.759      | [4]       |

## Reference

1. The International HapMap C: **A haplotype map of the human genome.** *Nature* 2005, **437**(7063):1299-1320.
2. Thompson EE, Kuttab-Boulos H, Witonsky D, Yang L, Roe BA, Di Rienzo A: **CYP3A variation and the evolution of salt-sensitivity variants.** *Am J Hum Genet* 2004, **75**(6):1059-1069.
3. **Database of Single Nucleotide Polymorphisms (dbSNP).** Bethesda (MD): National Center for Biotechnology Information, National Library of Medicine. dbSNP accession: **ss11901, ss16338660, ss16338962, ss20420720, ss22886629, ss3240877, ss48405656, & ss6484, (dbSNP Build ID: 126).** [<http://www.ncbi.nlm.nih.gov/SNP/>]
4. Osier MV, Cheung K-H, Kidd JR, Pakstis AJ, Miller PL, Kidd KK: **ALFRED: An allele frequency database for anthropology.** *American Journal of Physical Anthropology* 2002, **119**(1):77-83.
5. Young JH, Chang Y-PC, Kim JD-O, Chretien J-P, Klag MJ, Levine MA, Ruff CB, Wang N-Y, Chakravarti A: **Differential Susceptibility to Hypertension Is Due to Selection during the Out-of-Africa Expansion.** *PLoS Genetics* 2005, **1**(6):e82.
6. Danoviz ME, Pereira AC, Mill JG, Krieger JE: **Hypertension, Obesity and GNB3 gene variants.** *Clin Exp Pharmacol Physiol* 2006, **33**(3):248-252.
7. Mahmood MS, Mian ZS, Afzal AF, P.M.: **G-protein beta-3 subunit gene 825C>T dimorphism is associated with left ventricular hypertrophy but not essential hypertension.** *Med Sci Monit* 2005, **11**(1):CR6-CR9.
8. Li B, Ge D, Wang Y, Zhao W, Zhou X, Gu D, Chen R: **G Protein B3 Subunit Gene Variants and Essential Hypertension in the Northern Chinese Han Population.** *Annals of Human Genetics* 2005, **69**(4):468-473.
9. Martin DN, Andreu EP, Ramirez Lorca R, Garcia-Junco PS, Vallejo Maroto I, Santos RA, Miranda Guisado ML, Grijalvo OM, Ortiz JV, Carneado de la Fuente J: **G-protein beta-3 subunit gene C825 T polymorphism: Influence on plasma sodium and potassium concentrations in essential hypertensive patients.** *Life Sciences* 2005, **77**(23):2879.
10. Andersen G, Overgaard J, Albrechtsen A, GlÃ¼mer C, Borch-Johnsen K, JÃ¸rgensen T, Hansen T, Pedersen O: **Studies of the association of the GNB3 825C>T polymorphism with components of the metabolic syndrome in white Danes.** *Diabetologia* 2006, **49**(1):75.

11. **Database of Single Nucleotide Polymorphisms (dbSNP). Bethesda (MD): National Center for Biotechnology Information, National Library of Medicine. dbSNP accession: ss24654536 & ss5319242, (dbSNP Build ID: 126). [<http://www.ncbi.nlm.nih.gov/SNP/>]**
12. Grant SFA, Thorleifsson G, Reynisdottir I, Benediktsson R, Manolescu A, Sainz J, Helgason A, Stefansson H, Emilsson V, Helgadóttir A *et al*: **Variant of transcription factor 7-like 2 (TCF7L2) gene confers risk of type 2 diabetes.** *Nat Genet* 2006, **38**(3):320.
13. Prescott NJ, Fisher SA, Onnie C, Pattni R, Steer S, Sanderson J, Forbes A, Lewis CM, Mathew CG: **A general autoimmunity gene (PTPN22) is not associated with inflammatory bowel disease in a British population.** *Tissue Antigens* 2005, **66**(4):318-320.
14. Martin MC, Oliver J, Urcelay E, Orozco G, Gomez-Garcia M, Lopez-Nevot MA, Pinero A, Brieva JA, de la Concha EG, Nieto A *et al*: **The functional genetic variation in the PTPN22 gene has a negligible effect on the susceptibility to develop inflammatory bowel disease.** *Tissue Antigens* 2005, **66**(4):314-317.
15. Wagenleiter SEN, Klein W, Griga T, Schmiegel W, Epplen JT, Jagiello P: **A case-control study of tyrosine phosphatase (PTPN22) confirms the lack of association with Crohn's disease.** *International Journal of Immunogenetics* 2005, **32**(5):323-324.
16. Wipff J, Allanore Y, Kahan A, Meyer O, Mouthon L, Guillevin L, Pierlot C, Glickmans E, Bardin T, Boileau C *et al*: **Lack of association between the protein tyrosine phosphatase non receptor 22 (PTPN22) - 620W Allele and systemic sclerosis in the French Caucasian population.** *Ann Rheum Dis* 2006:ard.2005.048181.
17. Vandiedonck C, Capdevielle C, Giraud M, Krumeich S, Jais J-P, Eymard B, ChristineTranchant, Gajdos P, Garchon H-J: **Association of the PTPN22\*R620W polymorphism with autoimmune myasthenia gravis.** *Annals of Neurology* 2006, **59**(2):404-407.
18. Van-Oene M, Wintle RF, Liu X, Yazdanpanah M, Gu X, Newman B, Kwan A, Johnson B, Owen J, Greer W *et al*: **Association of the lymphoid tyrosine phosphatase R620W variant with rheumatoid arthritis, but not Crohn's disease, in Canadian populations.** *Arthritis & Rheumatism* 2005, **52**(7):1993-1998.
19. Carlton VEH, Hu X, Chokkalingam AP, Schrodi SJ, Brandon R, Alexander HC, Chang M, Catanese JJ, Leong DU, Ardlie KG *et al*: **PTPN22 Genetic Variation: Evidence for**

- Multiple Variants Associated with Rheumatoid Arthritis.** *Am J Hum Genet* 2005, 77(4):567-581.
20. Zheng W, She J-X: **Genetic Association Between a Lymphoid Tyrosine Phosphatase (PTPN22) and Type 1 Diabetes.** *Diabetes* 2005, 54(3):906-908.
21. Kyogoku C, Langefeld CD, Ortmann WA, Lee A, Selby S, Carlton VE, Chang MR, Baechler, E.C., Batliwalla FM, Novitzke J, Williams AH *et al*: **Genetic association of the R620W polymorphism of protein tyrosine phosphatase PTPN22 with human SLE.** *Am J Hum Genet* 2004, 75(3):504-507.
22. **Database of Single Nucleotide Polymorphisms (dbSNP).** Bethesda (MD): National Center for Biotechnology Information, National Library of Medicine. dbSNP accession: ss6903648, (dbSNP Build ID: 126). [<http://www.ncbi.nlm.nih.gov/SNP/>]
23. **Database of Single Nucleotide Polymorphisms (dbSNP).** Bethesda (MD): National Center for Biotechnology Information, National Library of Medicine. dbSNP accession: ss17401594, ss23587270, ss3172699, ss3250631, ss35036713, & ss5586237, (dbSNP Build ID: 126). [<http://www.ncbi.nlm.nih.gov/SNP/>]
24. **Database of Single Nucleotide Polymorphisms (dbSNP).** Bethesda (MD): National Center for Biotechnology Information, National Library of Medicine. dbSNP accession: ss3172700, ss35036695, ss48416871, ss4926109, & ss5586239, (dbSNP Build ID: 126). [<http://www.ncbi.nlm.nih.gov/SNP/>]
25. **Database of Single Nucleotide Polymorphisms (dbSNP).** Bethesda (MD): National Center for Biotechnology Information, National Library of Medicine. dbSNP accession: ss2261839 & ss23360032, (dbSNP Build ID: 126). [<http://www.ncbi.nlm.nih.gov/SNP/>]
26. Amundadottir LT, Sulem P, Gudmundsson J, Helgason A, Baker A, Agnarsson BA, Sigurdsson A, Benediktsdottir KR, Cazier J-B, Sainz J *et al*: **A common variant associated with prostate cancer in European and African populations.** *Nat Genet* 2006, 38(6):652.
27. **Database of Single Nucleotide Polymorphisms (dbSNP).** Bethesda (MD): National Center for Biotechnology Information, National Library of Medicine. dbSNP accession: ss2233714 & ss43742806, (dbSNP Build ID: 126). [<http://www.ncbi.nlm.nih.gov/SNP/>]
28. Haines JL, Hauser MA, Schmidt S, Scott WK, Olson LM, Gallins P, Spencer KL, Kwan SY, Noureddine M, Gilbert JR *et al*: **Complement Factor H Variant Increases the Risk of Age-Related Macular Degeneration.** *Science* 2005, 308(5720):419-421.

29. Edwards AO, Ritter R, III, Abel KJ, Manning A, Panhuysen C, Farrer LA: **Complement Factor H Polymorphism and Age-Related Macular Degeneration.** *Science* 2005, **308**(5720):421-424.
30. Scholl H, Weber B, then M, Wienker T, Holz F: **Y402H-Polymorphismus im Komplementfaktor H und altersabhängige Makuladegeneration (AMD).** *Der Ophthalmologe* 2005, **102**(11):1029.
31. Magnusson KP, Duan S, Sigurdsson H, Petursson H, Yang Z, Zhao Y, Bernstein PS, Ge J, Jonasson F, Stefansson E *et al*: **CFH Y402H Confers Similar Risk of Soft Drusen and Both Forms of Advanced AMD.** *PLoS Medicine* 2006, **3**(1).
32. Souied EH, Leveziel N, Richard F, Dragon-Durey MA, Coscas G, Soubrane G, Benlian P, Fremeaux-Bacchi V: **Y402H complement factor H polymorphism associated with exudative age-related macular degeneration in the French population.** *Mol Vis* 2005, **11**:1135-1140.
33. Sepp T, Khan JC, Thurlby DA, Shahid H, Clayton DG, Moore AT, Bird AC, Yates JRW, the Genetic Factors in AMDSG: **Complement Factor H Variant Y402H Is a Major Risk Determinant for Geographic Atrophy and Choroidal Neovascularization in Smokers and Nonsmokers.** *Invest Ophthalmol Vis Sci* 2006, **47**(2):536-540.
34. **Database of Single Nucleotide Polymorphisms (dbSNP).** Bethesda (MD): National Center for Biotechnology Information, National Library of Medicine. dbSNP accession: ss14878415, (dbSNP Build ID: 126). [<http://www.ncbi.nlm.nih.gov/SNP/>]
35. Emison ES, McCallion AS, Kashuk CS, Bush RT, Grice E, Lin S, Portnoy ME, Cutler DJ, Green ED, Chakravarti A: **A common sex-dependent mutation in a RET enhancer underlies Hirschsprung disease risk.** *Nature* 2005, **434**(7035):857.
