# Supplementary material for: Prevalence of common disease-associated variants in Asian Indians
Source: PubMed Central journal article supplement (PMC2267478; doi:10.1186/1471-2156-9-13), 2008-02-04
Supplement: 1471-2156-9-13-S2.pdf [file 1471-2156-9-13-S2.pdf]

**Supplemental Table 1.** Genotype frequencies of the 17 single nucleotide polymorphisms.

| Gene Name | Nucleotide Change | Homozygote Major Allele | Frequency | Homozygote Minor Allele | Frequency | Heterozygote | Frequency |
|-----------|-------------------|-------------------------|-----------|-------------------------|-----------|--------------|-----------|
| AGT       | g.802T>C          | TT                      | 0.155     | CC                      | 0.380     | TC           | 0.465     |
| CYP3A5    | g.6980G>A         | GG                      | 0.563     | AA                      | 0.083     | GA           | 0.354     |
| GNB3      | g.4423C>T         | CC                      | 0.464     | TT                      | 0.100     | CT           | 0.436     |
| ALOX5     | g.20C>T           | CC                      | 0.668     | TT                      | 0.054     | CT           | 0.278     |
| ALOX5     | g.8322G>A         | GG                      | 0.967     | AA                      | 0.000     | GA           | 0.033     |
| ALOX5     | g.50778G>A        | GG                      | 0.991     | AA                      | 0.000     | GA           | 0.009     |
| CAPN10    | g.4834T>C         | TT                      | 0.596     | CC                      | 0.057     | TC           | 0.347     |
| TCF7L2    | g.98386G>T        | GG                      | 0.565     | TT                      | 0.063     | GT           | 0.372     |
| PTPN22    | g.36677C>T        | CC                      | 0.983     | TT                      | 0.000     | CT           | 0.017     |
| rs1447295 | C>A               | CC                      | 0.760     | AA                      | 0.019     | CA           | 0.221     |
| CFH       | g.37989T>C        | TT                      | 0.511     | CC                      | 0.071     | TC           | 0.418     |
| LOC387715 | g.205G>T          | GG                      | 0.432     | TT                      | 0.108     | GT           | 0.460     |
| RET       | g.9349G>A         | GG                      | 0.567     | AA                      | 0.066     | GA           | 0.367     |
| TAS2R38   | g.144G>C          | GG                      | 0.420     | CC                      | 0.120     | GC           | 0.460     |
| TAS2R38   | g.784C>T          | CC                      | 0.406     | TT                      | 0.127     | CT           | 0.467     |
| TAS2R38   | g.885A>G          | AA                      | 0.401     | GG                      | 0.137     | AG           | 0.462     |
| SLC24A5   | g.13233G>A        | GG                      | 0.790     | AA                      | 0.017     | GA           | 0.193     |

**Supplemental Table 2.** Genotype frequencies of the ALOX5P (5'-GGGCGG-3')<sub>3-8</sub> microsatellite

| Allele | 3     | 4     | 5     | 6     | 7 | 8 |
|--------|-------|-------|-------|-------|---|---|
| 3      | 0.002 |       |       |       |   |   |
| 4      | 0.002 | 0.052 |       |       |   |   |
| 5      | 0.007 | 0.261 | 0.564 |       |   |   |
| 6      |       | 0.016 | 0.089 | 0.003 |   |   |
| 7      |       |       | 0.002 |       |   |   |
| 8      |       |       | 0.002 |       |   |   |

**Supplemental Table 3.** Genotype frequencies of the DG8S737 (AC)<sub>13-30</sub> microsatellite

| Allele | -10   | -9    | -8    | -7    | -6    | -5    | -4    | -3    | -2    | -1    | 0     | +1    | +2    | +3    | +4    | +5 | +6 | +7 |
|--------|-------|-------|-------|-------|-------|-------|-------|-------|-------|-------|-------|-------|-------|-------|-------|----|----|----|
| -10    |       |       |       |       |       |       |       |       |       |       |       |       |       |       |       |    |    |    |
| -9     |       |       |       |       |       |       |       |       |       |       |       |       |       |       |       |    |    |    |
| -8     |       |       |       |       |       |       |       |       |       |       |       |       |       |       |       |    |    |    |
| -7     | 0.002 |       |       |       |       |       |       |       |       |       |       |       |       |       |       |    |    |    |
| -6     |       |       |       |       |       |       |       |       |       |       |       |       |       |       |       |    |    |    |
| -5     |       |       |       |       | 0.002 |       |       |       |       |       |       |       |       |       |       |    |    |    |
| -4     |       | 0.003 |       |       |       | 0.002 | 0.014 |       |       |       |       |       |       |       |       |    |    |    |
| -3     |       |       |       |       |       |       | 0.010 |       |       |       |       |       |       |       |       |    |    |    |
| -2     |       | 0.009 | 0.003 |       | 0.002 | 0.007 | 0.019 | 0.019 | 0.024 |       |       |       |       |       |       |    |    |    |
| -1     | 0.002 | 0.009 | 0.002 |       | 0.009 | 0.005 | 0.038 | 0.028 | 0.057 | 0.069 |       |       |       |       |       |    |    |    |
| 0      |       | 0.002 |       |       | 0.003 | 0.002 | 0.036 | 0.012 | 0.031 | 0.059 | 0.019 |       |       |       |       |    |    |    |
| +1     | 0.002 |       |       |       | 0.002 | 0.003 | 0.012 | 0.016 | 0.038 | 0.036 | 0.023 | 0.010 |       |       |       |    |    |    |
| +2     |       |       |       |       |       |       | 0.007 | 0.005 | 0.017 | 0.028 | 0.014 | 0.003 | 0.010 |       |       |    |    |    |
| +3     |       | 0.003 |       |       | 0.009 | 0.003 | 0.010 | 0.007 | 0.023 | 0.052 | 0.019 | 0.021 | 0.003 | 0.016 |       |    |    |    |
| +4     |       | 0.002 |       | 0.002 | 0.002 |       |       | 0.003 | 0.009 | 0.017 | 0.016 | 0.012 | 0.003 | 0.002 | 0.005 |    |    |    |
| +5     |       |       |       |       | 0.003 |       |       |       | 0.002 | 0.009 | 0.003 | 0.002 | 0.002 | 0.003 |       |    |    |    |
| +6     |       |       |       |       |       |       | 0.003 |       |       |       |       |       |       |       |       |    |    |    |
| +7     |       |       |       |       |       |       |       |       | 0.002 |       |       | 0.002 |       |       |       |    |    |    |
